# Supplementary material for: Epidemiological Parameters of SARS-CoV-2 in the UK during the 2023/2024 Winter: A Cohort Study
Source: bioRxiv or medRxiv preprint supplement (doi:10.1101/2024.07.22.24310801), 2024-07-22
Supplement: Supplementary file [file media-1.pdf]

# Supplementary Material: Epidemiological Parameters of SARS-CoV-2 in the UK during the 2023/2024 Winter: A Cohort Study

**Christopher E. Overton<sup>\*1,2</sup>, Martyn Fyles<sup>2</sup>, Jonathon Mellor<sup>2</sup>, Robert S. Paton<sup>2</sup>, Alexander M. Phillips<sup>2,3</sup>, Alex Glaser<sup>2</sup>, Andre Charlett<sup>4</sup>, and Thomas Ward<sup>2</sup>**

<sup>1</sup> *Department for Mathematical Sciences, University of Liverpool*

<sup>2</sup> *Infectious Disease Modelling Team, All Hazards Intelligence, Data Analytics and Surveillance, UK Health Security Agency*

<sup>3</sup> *Department for Electrical Engineering and Electronics, University of Liverpool*

<sup>4</sup> *Statistics, Modelling, and Economics, Analytics & Data Science, Data Analytics and Surveillance, UK Health Security Agency*

\*Corresponding author: [c.overton@liverpool.ac.uk](mailto:c.overton@liverpool.ac.uk)

## 1 **Winter COVID-19 Infection Study Design**

2

### 3 Cohort

4 The cohort sampled for this study was selected from previous participants of the COVID-19 Infection  
5 Study (CIS)  
6 (<https://www.ons.gov.uk/peoplepopulationandcommunity/healthandsocialcare/conditionsanddiseases/bulletins/coronaviruscovid19infectionsurveypilot/latest>), a household study. Participants were  
7 asked if they would consent to being contacted by UKHSA for future studies – those who selected  
8 yes were asked to enrol. Individuals eligible for the study lived in private households and were 3  
9 years and older living in England or Scotland. Participants are asked a range of information about  
10 themselves and the results of SARS-CoV-2 diagnostic tests. The study was live from November 2023  
11 to March 2024. Overall, there were 123,243 participants and 426,667 responses. Further  
12 information about how this data was collected can be found in the ONS quality and methodology  
13 information page for the study  
14 (<https://www.ons.gov.uk/peoplepopulationandcommunity/healthandsocialcare/conditionsanddiseases/methodologies/wintercoronaviruscovid19infectionstudyqmi>). Information for the participants,  
15 including how to complete the questionnaire and conduct the tests are found on the ONS website  
16 (<https://www.ons.gov.uk/surveys/informationforhouseholdsandindividuals/householdandindividualsurveys/wintercoronaviruscovid19infectionstudy>). The participant breakdowns by reference group  
17 are given in Supplementary Table 1.  
18  
19  
20  
21

21

### 22 Survey Design

23 The study had three core surveys, the first “participant” survey collected key identifying information  
24 used to link data, such as names, addresses and demographics. The second “main” survey asked  
25 further questions relating to individual characteristics (such as job, household size), current and new  
26 symptoms, key survey dates (including window start date, LFD taken date, symptom onset date) and  
27 lateral flow device (LFD) test results. The third “follow up” survey was given to those who reported a  
28 positive test in the “main” survey. The “follow up” survey asked participants to test on alternating  
29 days following their first positive test.  
30 For each survey participants responded via an online survey portal which guided them through each  
31 question. Participants were not offered financial incentives for the study but were given the lateral  
32 flow devices as part of the operations.

33 Participants were grouped into waves, and testing windows. Each participant received 14 tests and  
 34 the start of the study and responded once to the main survey per wave, a total of 4 times over the  
 35 course of the study. Each wave ran for approximately 4 weeks, with wave 1 running from 14  
 36 November to 14 December 2023, wave 2 from 12 December 2023 to 11 January 2024, wave 3 from 9  
 37 January to 8 February 2024 and wave 4 from 6 February to 7 March 2024. To allow for flexible timing  
 38 in testing and response participants were given a window of 7 days to report their test. Participants  
 39 were prompted at the start of their testing window and again during their window to encourage  
 40 response. Tests taken up to two days before the start of the testing window were allowed to be  
 41 reported in the main survey.

42  
 43 Data Processing

44 Data were cleaned and duplicates dropped such that there was one record per participant per wave.  
 45 Records were removed where linkage information was unavailable, or demographics information  
 46 not given. This accounted for <1% of the participants and records. Samples were removed where the  
 47 individual did complete the main survey but did not take an LFD test.  
 48 Where a participant did not know their symptom onset date they were prompted to give a  
 49 placeholder date of the 15<sup>th</sup> of the most recent month, for both the follow up and main survey.  
 50 Therefore, values for symptom onset on these dates were assumed as missing. Demographic and  
 51 participant characteristic information was captured in the first main survey response and not again  
 52 unless there was a change in circumstance to avoid lengthy surveys. These demographic data were  
 53 therefore filled forward. Participants who withdrew consent part way through or after the study  
 54 were excluded from the analysis.

55  
 56 **Supplementary Table 1.** The count (n) and proportion (%) of participants in each strata. The proportions are  
 57 calculated as the count within a strata divided by the count within a group.

| group    | strata                   | n (participants) | % (participants) | n (responses) | % (responses) | % (population) |
|----------|--------------------------|------------------|------------------|---------------|---------------|----------------|
| all      |                          | 123243           |                  | 426667        |               |                |
| age      | 3 to 17                  | 3886             | 3.15             | 11083         | 2.6           | 20.55          |
| age      | 18 to 34                 | 4220             | 3.42             | 11426         | 2.68          | 21.37          |
| age      | 35 to 44                 | 9959             | 8.08             | 29803         | 6.99          | 13.49          |
| age      | 45 to 54                 | 18448            | 14.97            | 61061         | 14.31         | 12.72          |
| age      | 55 to 64                 | 30387            | 24.66            | 108950        | 25.54         | 13.09          |
| age      | 65 to 74                 | 36813            | 29.87            | 133983        | 31.4          | 9.77           |
| age      | 75 and over              | 19530            | 15.85            | 70361         | 16.49         | 9              |
| sex      | Female                   | 70189            | 56.95            | 241721        | 56.65         | 50.99          |
| sex      | Male                     | 53054            | 43.05            | 184946        | 43.35         | 49.01          |
| location | North West               | 13812            | 11.21            | 47568         | 11.15         | 12             |
| location | East Midlands            | 8977             | 7.28             | 31266         | 7.33          | 7.86           |
| location | South East               | 18782            | 15.24            | 65579         | 15.37         | 14.94          |
| location | London                   | 18118            | 14.7             | 61023         | 14.3          | 14.31          |
| location | South West               | 12732            | 10.33            | 44551         | 10.44         | 9.19           |
| location | Scotland                 | 11469            | 9.31             | 39968         | 9.37          | 8.72           |
| location | East of England          | 13969            | 11.33            | 48642         | 11.4          | 10.25          |
| location | Yorkshire and The Humber | 10634            | 8.63             | 36931         | 8.66          | 8.84           |
| location | West Midlands            | 9722             | 7.89             | 33590         | 7.87          | 9.63           |
| location | North East               | 5028             | 4.08             | 17549         | 4.11          | 4.27           |

58

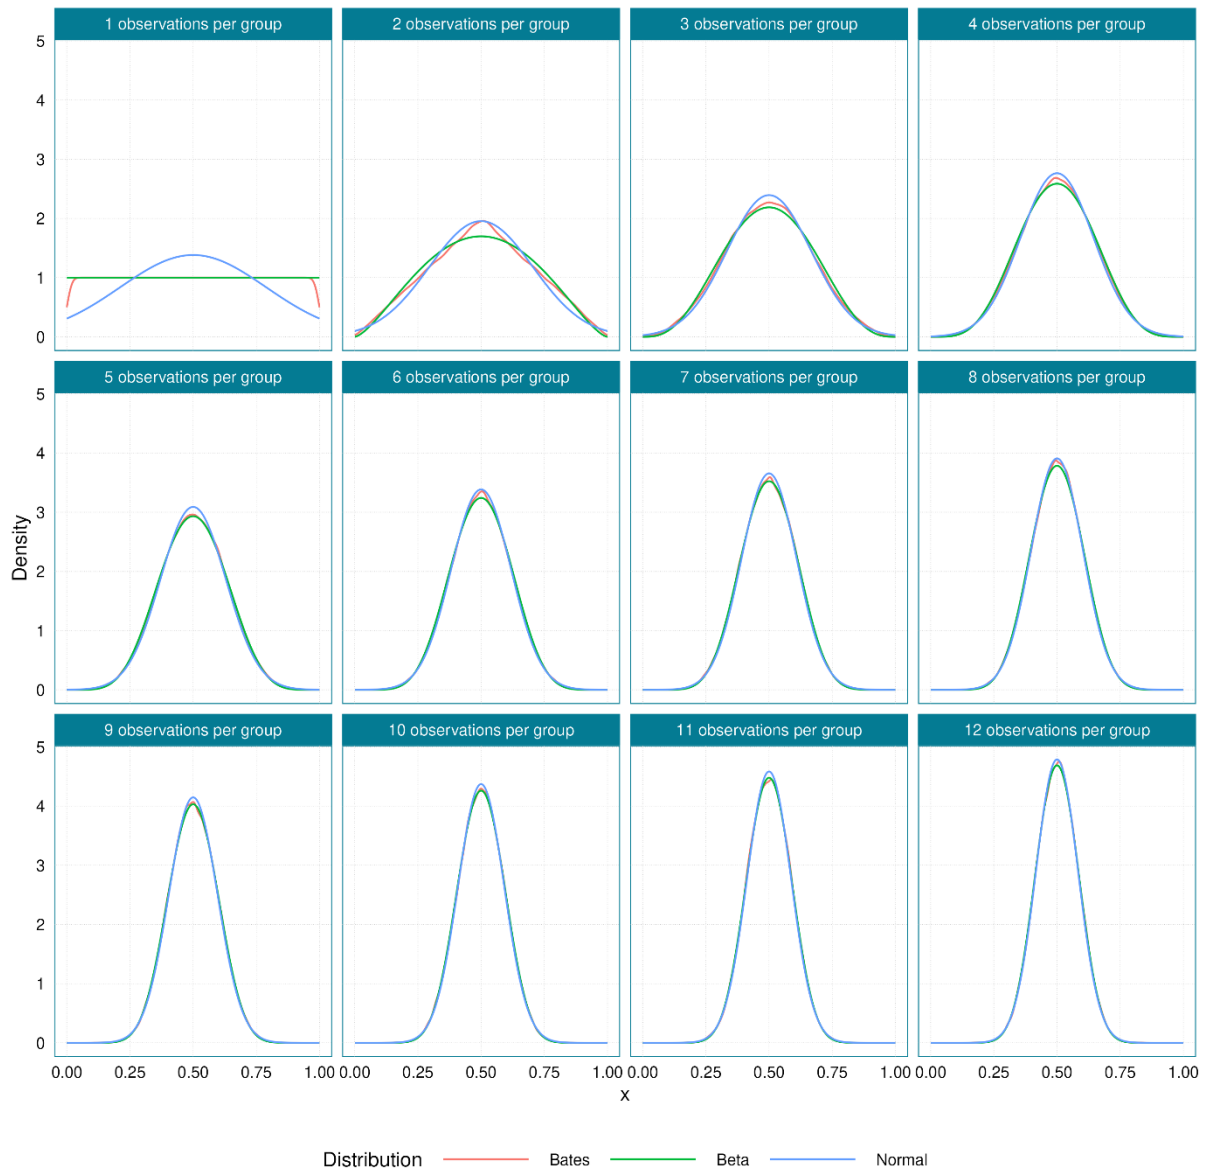

59

60 **Supplementary Figure 1:** Comparing the Beta and Normal distribution approximations to the Bates  
 61 distribution, for Bates(1) to Bates(12) distributions. The Bates distribution densities are simulated.

62 For Bates(1), the decline at 0 and 1 are numerical errors from approximating the density of a

63 Uniform(0,1) distribution – the true density should be straight line from 0 to 1.

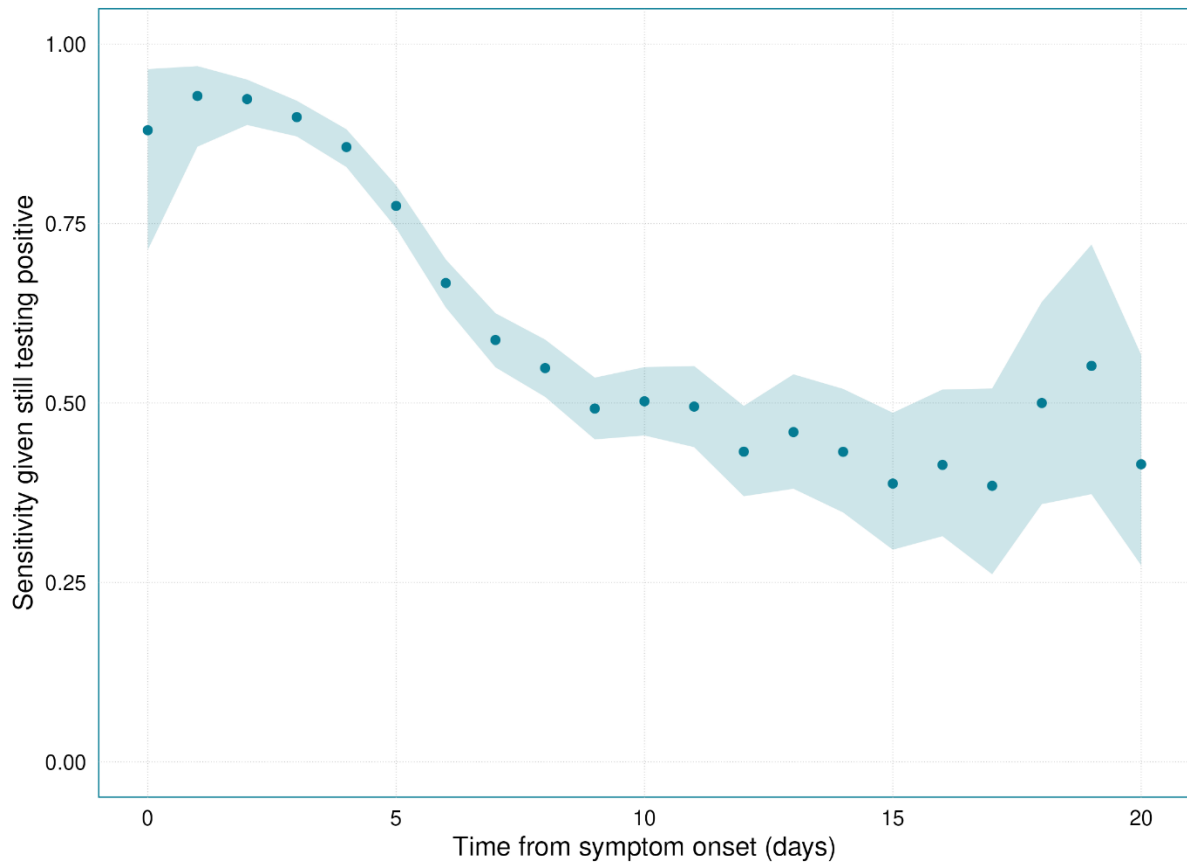

64

65 **Supplementary Figure 2:** Sensitivity data with beta distribution uncertainty, aggregated across all  
 66 age groups. The dots are the raw data and the blue shaded region indicates beta distributed 95%  
 67 confidence intervals around the raw data.

68

69 **Supplementary Table 2:** Loo estimates for the three different distributions used to model the  
 70 incubation period.

| Model     | LOO – Estimate | LOO – Standard Error |
|-----------|----------------|----------------------|
| Weibull   | 4434.7         | 68.1                 |
| Lognormal | 4458.3         | 62.6                 |
| Gamma     | 4455.3         | 65.6                 |

71

72 **Supplementary Table 3:** Model outputs for the three different distributions used to model the  
 73 incubation period.

| Age Group         | Distribution | Mean Incubation Period     | Median Incubation Period   | 95 <sup>th</sup> Percentile of the Incubation Period |
|-------------------|--------------|----------------------------|----------------------------|------------------------------------------------------|
| 3 to 17 years     | Lognormal    | 2.55 (95% CrI: 2.32, 2.83) | 2.21 (95% CrI: 1.93, 2.52) | 5.37 (95% CrI: 4.77, 6.08)                           |
| 18 to 34 years    | Lognormal    | 2.58 (95% CrI: 2.44, 2.82) | 2.25 (95% CrI: 2.1, 2.49)  | 5.36 (95% CrI: 4.86, 5.84)                           |
| 35 to 44 years    | Lognormal    | 2.57 (95% CrI: 2.42, 2.76) | 2.23 (95% CrI: 2.08, 2.42) | 5.34 (95% CrI: 4.89, 5.81)                           |
| 45 to 54 years    | Lognormal    | 2.55 (95% CrI: 2.4, 2.69)  | 2.22 (95% CrI: 2.08, 2.36) | 5.28 (95% CrI: 4.77, 5.68)                           |
| 55 to 64 years    | Lognormal    | 2.51 (95% CrI: 2.37, 2.62) | 2.15 (95% CrI: 2.03, 2.25) | 5.31 (95% CrI: 4.95, 5.69)                           |
| 65 to 74 years    | Lognormal    | 2.59 (95% CrI: 2.48, 2.72) | 2.23 (95% CrI: 2.13, 2.34) | 5.48 (95% CrI: 5.17, 5.89)                           |
| 75 years and over | Lognormal    | 2.53 (95% CrI: 2.38, 2.66) | 2.18 (95% CrI: 2.03, 2.29) | 5.38 (95% CrI: 5.01, 5.81)                           |
| 3 to 17 years     | Gamma        | 2.55 (95% CrI: 2.31, 2.85) | 2.3 (95% CrI: 2.03, 2.62)  | 5.19 (95% CrI: 4.63, 5.74)                           |

|                   |                |                            |                            |                            |
|-------------------|----------------|----------------------------|----------------------------|----------------------------|
| 18 to 34 years    | <i>Gamma</i>   | 2.57 (95% CrI: 2.42, 2.82) | 2.33 (95% CrI: 2.16, 2.6)  | 5.2 (95% CrI: 4.76, 5.6)   |
| 35 to 44 years    | <i>Gamma</i>   | 2.56 (95% CrI: 2.41, 2.75) | 2.32 (95% CrI: 2.16, 2.52) | 5.15 (95% CrI: 4.71, 5.54) |
| 45 to 54 years    | <i>Gamma</i>   | 2.54 (95% CrI: 2.39, 2.68) | 2.31 (95% CrI: 2.15, 2.45) | 5.08 (95% CrI: 4.62, 5.42) |
| 55 to 64 years    | <i>Gamma</i>   | 2.5 (95% CrI: 2.37, 2.61)  | 2.25 (95% CrI: 2.12, 2.36) | 5.15 (95% CrI: 4.86, 5.44) |
| 65 to 74 years    | <i>Gamma</i>   | 2.59 (95% CrI: 2.48, 2.72) | 2.32 (95% CrI: 2.21, 2.45) | 5.34 (95% CrI: 5.08, 5.66) |
| 75 years and over | <i>Gamma</i>   | 2.53 (95% CrI: 2.38, 2.66) | 2.27 (95% CrI: 2.12, 2.41) | 5.2 (95% CrI: 4.88, 5.54)  |
| 3 to 17 years     | <i>Weibull</i> | 2.55 (95% CrI: 2.25, 2.87) | 2.34 (95% CrI: 2.04, 2.65) | 5.25 (95% CrI: 4.44, 6.12) |
| 18 to 34 years    | <i>Weibull</i> | 2.57 (95% CrI: 2.39, 2.86) | 2.37 (95% CrI: 2.18, 2.65) | 5.31 (95% CrI: 4.83, 5.92) |
| 35 to 44 years    | <i>Weibull</i> | 2.54 (95% CrI: 2.35, 2.74) | 2.35 (95% CrI: 2.16, 2.56) | 5.12 (95% CrI: 4.65, 5.63) |
| 45 to 54 years    | <i>Weibull</i> | 2.5 (95% CrI: 2.31, 2.66)  | 2.32 (95% CrI: 2.11, 2.49) | 5.03 (95% CrI: 4.6, 5.46)  |
| 55 to 64 years    | <i>Weibull</i> | 2.5 (95% CrI: 2.36, 2.61)  | 2.27 (95% CrI: 2.13, 2.39) | 5.26 (95% CrI: 4.96, 5.56) |
| 65 to 74 years    | <i>Weibull</i> | 2.62 (95% CrI: 2.5, 2.77)  | 2.38 (95% CrI: 2.25, 2.53) | 5.54 (95% CrI: 5.25, 5.88) |
| 75 years and over | <i>Weibull</i> | 2.53 (95% CrI: 2.36, 2.68) | 2.31 (95% CrI: 2.14, 2.47) | 5.25 (95% CrI: 4.89, 5.64) |

74

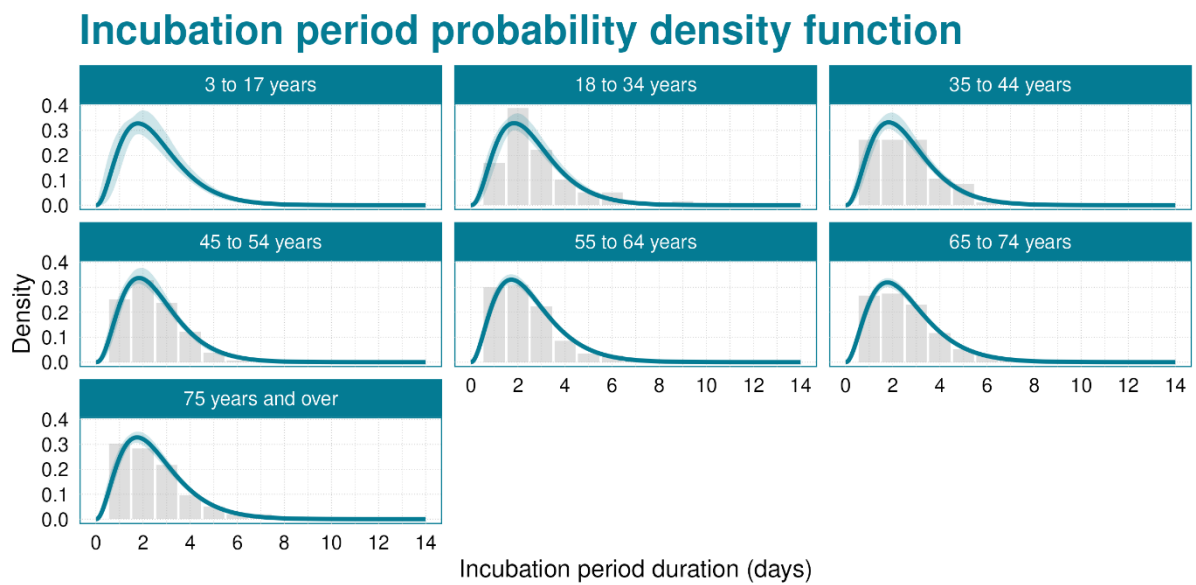

75

76 **Supplementary Figure 3:** Incubation period distributions estimated using the gamma distribution.  
 77 The blue line shows the median of the posterior distribution, and the blue shaded region is the 95%  
 78 credible interval. The grey histogram shows the raw data (the 3 to 17 years age group data are  
 79 masked due to low counts).

## Incubation period probability density function

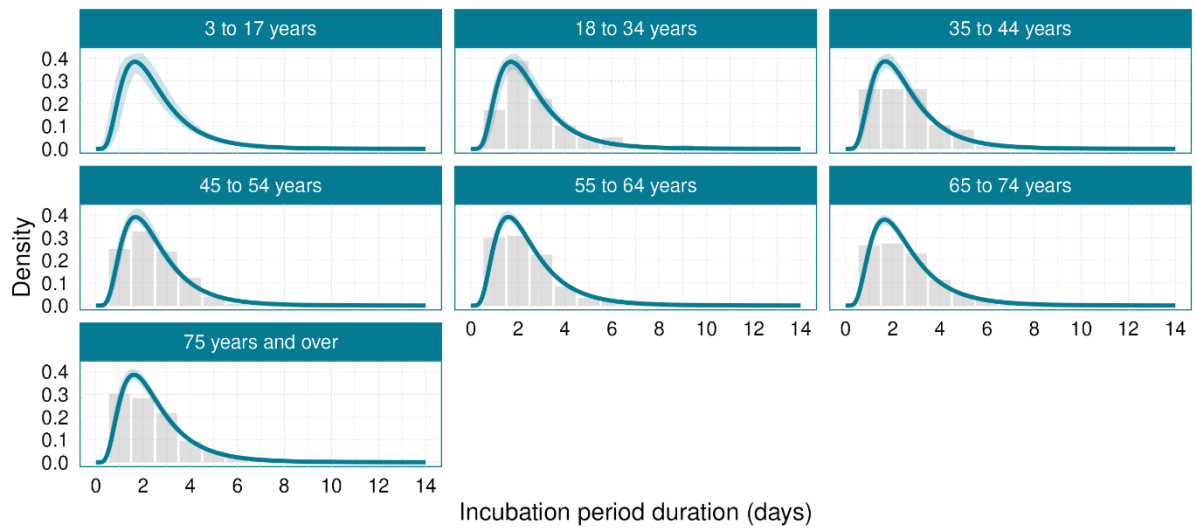

80

81 **Supplementary Figure 4:** Incubation period distributions estimated using the lognormal distribution.

82 The blue line shows the median of the posterior distribution, and the blue shaded region is the 95%

83 credible interval. The grey histogram shows the raw data (the 3 to 17 years age group data are

84 masked due to low counts).

85

86
